# Supplementary material for: Modelling the Effects of Traits and Abiotic Factors on Viral Lysis in Phytoplankton
Source: Frontiers journal article supplement (doi:10.3389/fmars.2021.667184), 2021-05-21
Supplement: Table_1.XLSX [file Table_1.XLSX]

## Sheet: Equations
		Equation syntax follows that of Powersim Studio 10. "Levels" are state variables, described here as initial values plus flows in and out at each timestep
		Actual values for constants and state variable initial values may be changed
Name	Variable Type	Definition	Unit and Documentation	Note
A1_gro	auxiliary	IF(A1>0,A1*A1_u)	mgN m-3 d-1 growth of A1 biomass
A1_m3	auxiliary	IF(A1>0,A1/(A1N/1e6))	cells m-3 uninfected algal abundance; Nalg is ngN/cell, Alg is mgN/m3
A1_mL	auxiliary	A1_m3/1e6	nos mL-1 uninfected algal abundance per mL
A1_Nu	auxiliary	IF(NH4>0,NH4/(NH4+Kg))	dl A1 nutrient status
A1_PSm	auxiliary	A1Umax*(1+BR_Phy)	N N-1 d-1 maximum photosynthesis rate for A1
A1_PSqm	auxiliary	A1_PSm*A1_Nu	N N-1 d-1 mxaimum nutrient-light growth rate for A1
A1_PSqz	auxiliary	A1_PSqm*(LN(A1_pytq+SQRT(1+A1_pytq^2))-LN(A1_pytq*exatt+SQRT(1+(A1_pytq*exatt)^2)))/att_tot	intermediate in Smith equation
A1_pytq	auxiliary	IF(FRAC(TIME)<LD,(alpha_u*PFD*24*60*60)/A1_PSqm,1e-10)	intermediate in Smith equation
A1_u	auxiliary	A1_PSqz-A1Umax*BR_Phy	N N-1 d-1 growth rate of A1
A1c	auxiliary	A1_ESD*A1cMult	m s-1 motion of Alg1
A1cyst	auxiliary	IF(A1>0,A1*A1cystpc)	mgN m-3 d-1 Alg1 cyst formation
A1fragESD	auxiliary	((4/3*PI*(A1_ESD/2)^3)/A1frags)^(1/3)/PI/3/4*2	m ESD of fragments from lysis of algal host (calculated from even distingetration of host biovolume into s number of fragments set by "frags")
A1fV1_ads	auxiliary	cA1fV1*V1_m3*(A1v1frag_m3)	number of V1 absorbed in 1m3 in a day by the number of particles of fragments of A1 present in that water
A1IV1_ads	auxiliary	cA1V1*(A1v1I_m3)*V1_m3	number of V1 absorbed in 1m3 in a day by the number of particles of infected A1 present in that water
A1N	auxiliary	(NC*a*(4/3*PI*((A1_ESD*1e6)/2)^3)^b)/1000	ngN cell-1 algal cell N-biomass; equation gives pg/cell hence *1/1000 (Ehux 1.40067 pgN cell⁻¹)
A1V1_ads	auxiliary	cA1V1*V1_m3*A1_m3	number of V1 absorbed in 1m3 in a day by the number of particles of A1 present in that water
A1v1_fragin	auxiliary	ARRSUM(A1v1_lyse)-V1_inc	mgN m-3 d-1 input to fragments of A1 from V1 infection
A1v1_lyse	auxiliary	IF(FRAC(TIME/TIMESTEP)=0,1)* FOR(A=FIRST(gen)..LAST(gen) | IF(A=LAST(A)OR A>=A1v1LPgen AND(A1v1Io[INDEX(A-1)]>0), A1v1Io[INDEX(A-1)], 0) )	mgN m-3 infected Alg1 biomass that is bursting by V1
A1v1fN_recyc	auxiliary	A1v1_fragN*0.2	mgN m-3 d-1 recycling of N from fragments of Alg1 lysed by V1
A1v1frag_m3	auxiliary	IF(A1v1_fragN>0,A1v1_fragN/((A1N/1e6)/A1frags))	fragments mL-1 fragment abundance; Nalg is ngN/cell, fragments is mgN/m3 = ugN/L = ngN/mL
A1v1I_gro	auxiliary	FOR(A=FIRST(gen)..LAST(gen) | A1v1I[A]*A1_u )	mgN m-3 d-1 growth of A1 infected by V1
A1v1I_m3	auxiliary	IF(A1v1I_tot>0,A1v1I_tot/(A1N/1e6))	cells m-3 abundance of A1 infected by V1; Nalg is ngN/cell, Alg is mgN/m3 = ugN/L = ngN/mL
A1v1I_mL	auxiliary	A1v1I_m3/1e6	cells mL-1 abundance of A1 infected by V1
A1v1I_tot	auxiliary	ARRSUM(A1v1I)	mgN m-3 total A1 biomass infected by V1
A1v1Ii	auxiliary	IF(FRAC(TIME/TIMESTEP)=0,1)* FOR(A=FIRST(gen)..LAST(gen) | IF(A>FIRST(A) AND A<LAST(A)AND A<A1v1LPgen AND(A1v1Io[INDEX(A-1)]>0), A1v1Io[INDEX(A-1)], 0) )	mgN m-3 d-1 advancement of V1 development in host, corrected for grazer losses of infected A1 and also for lysis if the time is due
A1v1infec	auxiliary	FOR(A=FIRST(gen)..LAST(gen) | IF(A=FIRST(A),A1V1Ir) )	mgN m-3 d-1 input to A1 infected by V1
A1v1Io	auxiliary	IF(FRAC(TIME/TIMESTEP)=0,1)* FOR(A=FIRST(gen)..LAST(gen) | A1v1I[A]/TIMESTEP )	mgN m-3 d-1 advancement of V1 development in A1 host
A1V1Ir	auxiliary	IF(A1>1e-5,Ads_prob*V1Inf*A1V1_ads*(A1N/1e6))	infection of A1 by V1; division by 1e6 is to convert pg cell-1 to mg cell-1 (the state variables being mgN m-3)
A1v1LP	auxiliary	LN(2)/(A1_u/V1LPDT_min + LN(2)/LP_max*(1-A1_u/A1Umax))	d latent period for V1 in host Alg1
A1v1LPgen	auxiliary	INTEGER(A1v1LP/TIMESTEP)	release of V1 from A1 once elapsed time exceeds the value of LP
att_tot	auxiliary	MLD*(attco_w+attco_Phy)	m-1 total light attenuation
att_totUV	auxiliary	MLD*(attco_wUV+attco_OrgCUV)	m-1 total light attenuation
attco_OrgCUV	auxiliary	abco_OrgCUV*orgC	m-1 UV attenuation by organics (mgC/m3 * m2*(mgC)-1 = m-1)
attco_Phy	auxiliary	abco_PhyN*(totAlg1)	attenuation coeff for algae
Auxiliary_1	auxiliary	PAUSEIF(FRAC(TIME/PauseT)=0)	pause control
avgUV	auxiliary	UVI/att_totUV*(1-EXP(-att_totUV))	umol photon m-2 s-1 average PFD in the MLD
cA1fV1	auxiliary	(4*PI*(A1fragESD/2)*V1Dv*0.5*(1+(1+2*(A1fragESD/2)*0/V1Dv)^(1/3)))*24*60*60	m3 particle-1 d-1 volume contact rate (akin to clearance rate)
cA1V1	auxiliary	(4*PI*(A1_ESD/2)*V1Dv*0.5*(1+(1+2*(A1_ESD/2)*A1c/V1Dv)^(1/3)))*24*60*60	m3 particle-1 d-1 volume contact rate (akin to clearance rate)
csedV1	auxiliary	(4*PI*(sed_ESD/2)*V1Dv*0.5*(1+(1+2*(sed_ESD/2)*0/V1Dv)^(1/3)))*24*60*60	m3 particle-1 d-1 volume contact rate (akin to clearance rate)
cum_A1V1_infec_mL	auxiliary	(cum_A1V1_infec/(A1N/1e6))/1e6	cells mL-1 cummulative A1 infected by V1
cum_A1V1_lyse_mL	auxiliary	(cum_A1V1_lyse/(A1N/1e6))/1e6	cells mL-1 cummulative A1 lysed by V1
cum_V1_inc_mL	auxiliary	(cumV1_inc/(V1N/1e6))/1e6	virus mL-1 cummulative V1 released from lysed A1
exatt	auxiliary	EXP(-att_tot)	dl intermediate in Smith equation
infectA1V1mLd	auxiliary	ARRSUM(A1v1infec)/A1N	cells mL-1 d-1 infection rate of A1 by V1
Inoc1	auxiliary	initDIN*InocA1pc/100	mgN m-3 inoculum of A1
inoc_A1	auxiliary	IF(TIME>0 AND FRAC(TIME/Inoc_f)=0,A1cysts*(1/TIMESTEP),0)	mgN m-3 d-1 inoculum of A1 from cysts
InocV1	auxiliary	initDIN*InocV1pc/100	mgN m-3 inoculum of V1
Nut_use	auxiliary	(A1_gro+ARRSUM(A1v1I_gro))	mgN m-3 d-1 total use of DIN by algae
orgC	auxiliary	(sysN-NH4)/NC	mgC m-3 organic C load
regeneration	auxiliary	(V1_degrad+A1v1fN_recyc)
releaseV1mLd	auxiliary	V1_inc/V1N	virus mL-1 d-1 release rate of V1 from A1
sed_mL	auxiliary	sed_m3/1e6	sediment particles mL-1
sedV1_ads	auxiliary	csedV1*V1_m3*sed_m3	number of V1 absorbed in 1m3 in a day by the number of particles of sediment present in that water
sysN	auxiliary	NH4+(A1+A1cysts)+(A1v1I_tot+A1v1_fragN)+(V1+Virus_ad)	mgN m-3 total system-N
Tfrag_mL	auxiliary	(A1v1frag_m3)/1e6
TotalA1_mL	auxiliary	A1_mL+A1v1I_mL	cells mL-1 Total A1 cells mL-1
totAlg1	auxiliary	A1+A1v1I_tot	mgN/m3 all Alg1
UVI	auxiliary	IF(FRAC(TIME)<LD,PFD/2000,1e-10)	dl UV index at surface, setting 1 when surface PAR PFD = 2000 umol/m2/s
V1_degrad	auxiliary	IF(V1>0,V1*V1dec)	mgN m-3 d-1 V1 decay
V1_inc	auxiliary	V1_lyse*V1N*Sw_Vattack	mgN m-3 d-1 V1 increase due to lysing of host Alg1
V1_lyse	auxiliary	V1B*ARRSUM(A1v1_lyse)/A1N	the lysis is in ng algalN/mL - convert that to the number of cells bursting, *the burst to get the number of viruses released, convert that into virual N-mass
V1_m3	auxiliary	MAX(V1/(V1N/1e6),0)	virus m-3 abundance of V1; Nvirus is ngN/virus, Virus is mgN/m3 = ugN/L = ngN/mL
V1_mL	auxiliary	V1_m3/1e6	virus mL-1 abundance of V1
V1B	auxiliary	(A1_Nu*(1-V1relBmin)+V1relBmin)*V1B_max	virus host-1 current burst size for V1 in Alg1 as a function of host N-status
V1B_max	auxiliary	IF(Sw_allo_Bmax=0,V1B_maxf, 2E10*A1_ESD^1.394)	virus host-1 maximum burst size either set as a fixed value (Sw_allo_Bmax=0), or alometrically related to the host ESD (Sw_allo_Bmax=1)
V1C	auxiliary	0.1602*((4/3*PI*((V1ESD*1e6))/2)^3)^0.9283	pgC virus-1 V1 C content form allometrics
V1dec	auxiliary	V1dec_min+avgUV*(V1dec_max-V1dec_min)	d-1 virus decay rate taking accunt of light attentuation
V1Dv	auxiliary	(kB*T)/(6*PI*neta*V1ESD/2)	m2 s-1 diffusivity of virus
V1ESDnm	auxiliary	V1ESD*1e9	nm V1 ESD in nanometres
V1N	auxiliary	0.3784*V1C/1e3	ngN virus-1 N-content for V1
V1totAds	auxiliary	(V1N/1e6)*Ads_prob*(A1V1_ads+A1IV1_ads+A1fV1_ads+sedV1_ads)	total absorbance removing V1; division by 1e6 is to convert pg virus-1 to mg virus-1 (the state variables being mgN m-3)
Vads	auxiliary	V1totAds	virus adsorbed mgN/m3/d
a	constant	0.216	dl a in Menden-Duer equation
A1_ESD	constant	5e-06	m ESD of alga A1
A1cMult	constant	2	dl body lengths motion per second
A1cystpc	constant	0.1	dl proportion of A1 population that contributes to cysts
A1frags	constant	100	nos (algal cell)-1 number of fragments the host algae colapses into on virus lysis
A1Umax	constant	0.7	d-1 maximum growth rate for A1
abco_OrgCUV	constant	0.039*12	m2*(mgC)-1 attenutaion per mgC organic loading (assumed similar to that for DOC)
abco_PhyN	constant	0.02*0.02/0.15	light absorbance coeff by algal biomass
Ads_prob	constant	0.5	adsorbance quotient
alpha_u	constant	7e-6*0.06	slope of PE curve
attco_w	constant	0.05	attenutation coeff for water
attco_wUV	constant	0.12	m attenuation coeff of UV by water
b	constant	0.939	dl b in Menden-Duer equation
BR_Phy	constant	0.05	dl basal respiration for algae as proportion of Umax
fragDec	constant	0.2	d-1 fragment decay rate
initDIN	constant	14*10	mgN m-3 DIN concentration; mg/m3 = ug/L; 14 = 1uM
Inoc_f	constant	14	d frequency of re-inoculation
InocA1pc	constant	2	inoculum of A1 as % of DIN
InocV1pc	constant	1e-06	inoculum of V1 as % of DIN
kB	constant	1.38e-23	m2 kg s-2 K-1 Boltzmann constant
Kg	constant	14	mgN m-3 Kg for algal (host growth)
LD	constant	0.7	dl proportion of day that is lit
LP_max	constant	2.5	d maximum latent period NOTE: beware array size implications!! .. LP_max/TIMESTEP must not exceed the array size
MLD	constant	20	m mixed layer depth
NC	constant	0.15	gN/gC N:C for host (alga)
neta	constant	0.00099	kg m-1 s-1 9.9E-4 dynamic viscosity of virus* (Murray & Jackson 1992)
PauseT	constant	500	d pause control
PFD	constant	2000	umol photon m-2 s-1 surface PAR
sed_ESD	constant	4e-05	m sediment ESD (fine sediment is ca. 20-40um; sizes above 40um are cohesion-less, below 40 they increasingly clump)
sed_m3	constant	1000000000	nos m-3 sediment partcle count per m3. 1mL-1 = 1e6
Sw_allo_Bmax	constant	0	dl switch to enable allometric setting of Bmax; 0 set manualy, 1 set allometrically
Sw_Vattack	constant	1	dl switch to select for viral attack
T	constant	273+10	K e.g. 273+10 temperature in Kelvin
V1B_maxf	constant	200	virus host-1 virus burst size (for E.hux this is between 400-600)
V1dec_max	constant	0.35	d-1 virus decay rate
V1dec_min	constant	0.05	d-1 minimum virus decay rate with 0 avgPFD
V1ESD	constant	1e-08	m e.g. 1E-8 to 1E-7 ESD of Virus
V1Inf	constant	0.2	dl likelihood of infection taking hold
V1LPDT_min	constant	0.5	dl minimum latent period for V1 related to umax (usually this is between 0.5 and 1)
V1relBmin	constant	0.2	dl minimum burst size relative to Bmax
w	constant	0	m s-1 Root-mean-squared turbulence (0 to 0.003)	The value of w describes the root-mean-squared turbulence (m s-1); Rothschild and Osborn (1988) provide a relationship between wind speed and root-mean squared turbulence, considering values of w from 0 to 0.003 m s-1, noting the relative importance of turbulence for encounters with smaller organisms.
A1	level	Inoc1 +dt*(A1_gro+inoc_A1-A1cyst-A1V1infec)	mgN m-3 uninfected A1 algal biomass (=ugN/L = ngN/mL)
A1cysts	level	0 +dt*(A1cyst-inoc_A1)	mgN m-3 Alg1 cysts
A1v1_fragN	level	0 +dt*(A1V1_fragin-A1V1fN_recyc)	mgN m-3 fragments of A1 from V1 infections
A1v1I	level	0 +dt*(A1V1l_gro+A1V1li+A1V1infec-A1V1lo)	mgN m-3 infected A1 biomass with infection at different stages by V1
cum_A1V1_infec	level	0 +dt*(A1V1infec)	mgN m-3 cummulative A1 infected by V1
cum_A1V1_lyse	level	0 +dt*(A1V1_lyse)	mgN m-3 cummulative A1 lysed by V1
cumV1_inc	level	0 +dt*(V1_inc)	mgN m-3 cummulative V1 released from lysed A1
NH4	level	initDIN +dt*(regeneration-Nut_use)	mgN m-3 nutrient N for support of algal growth
V1	level	InocV1 +dt*(V1_inc-V1_degrad-V1totAds)	mgN m-3 V1 biomass abundance = ugN/L = ngN/mL)
Virus_ad	level	0 +dt*(Vads)	virus adsorbed mgN/m3 (just used to check system balance)
